# Supplementary material
Source: PubMed Central journal article supplement (PMC1266416)

# Mizuno et al. Fig. S2

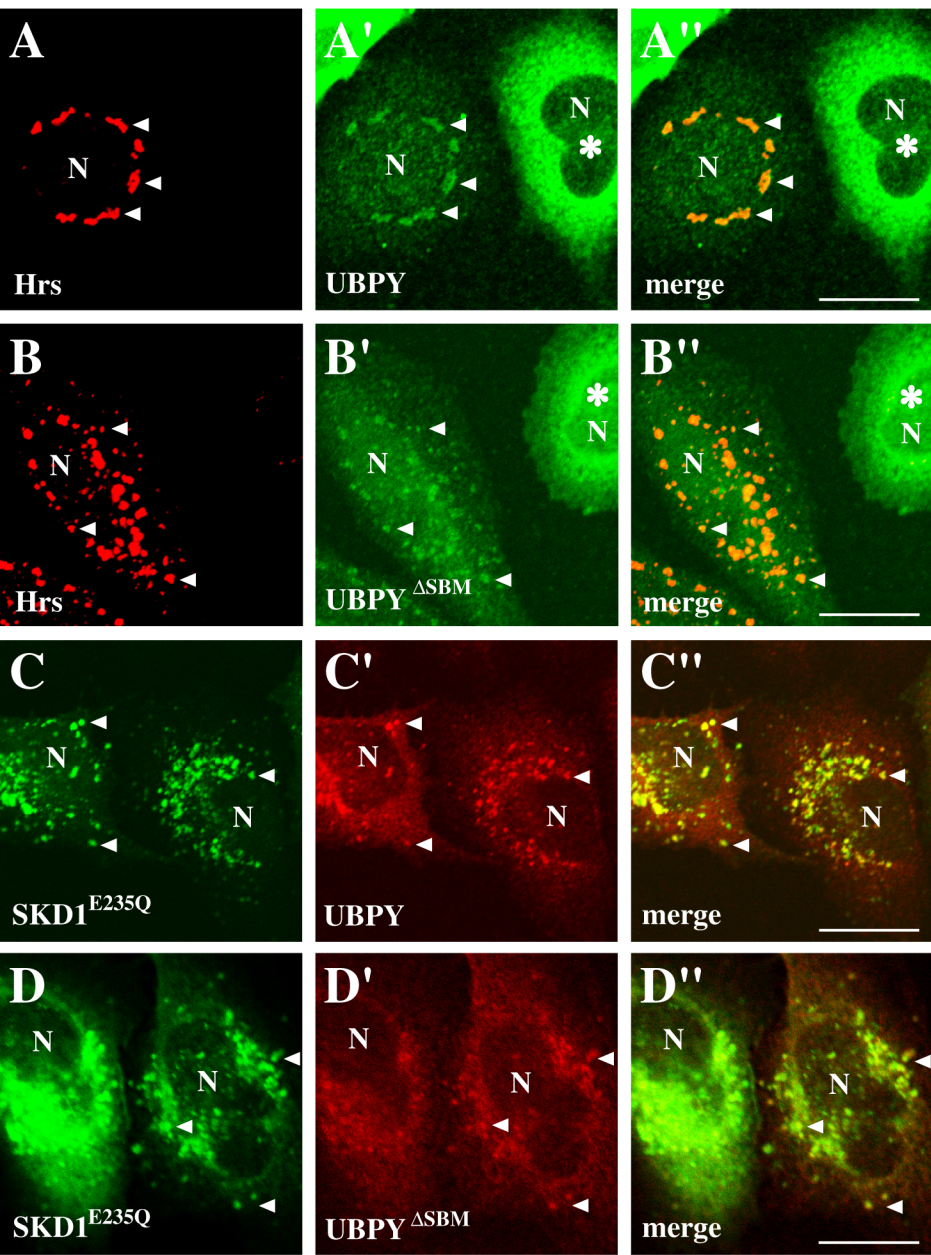

Supplement: mbc_E05-06-0560_1.pdf [file mbc_E05-06-0560_1.pdf]
